# Supplementary material
Source: publisher figshare collection journal article supplement (https://asha.figshare.com/articles/dataset/_/27018124)

**Supplemental Material S3.** Frequency of correct and incorrect attempts for each BE verb probe and per participant.

AQ = Auxiliary Questions. AD = Auxiliary Declaratives. CQ = Copula Questions. CD = Copula Declaratives.

**DLD P1:**

### DLD P1 Auxiliary Question Production

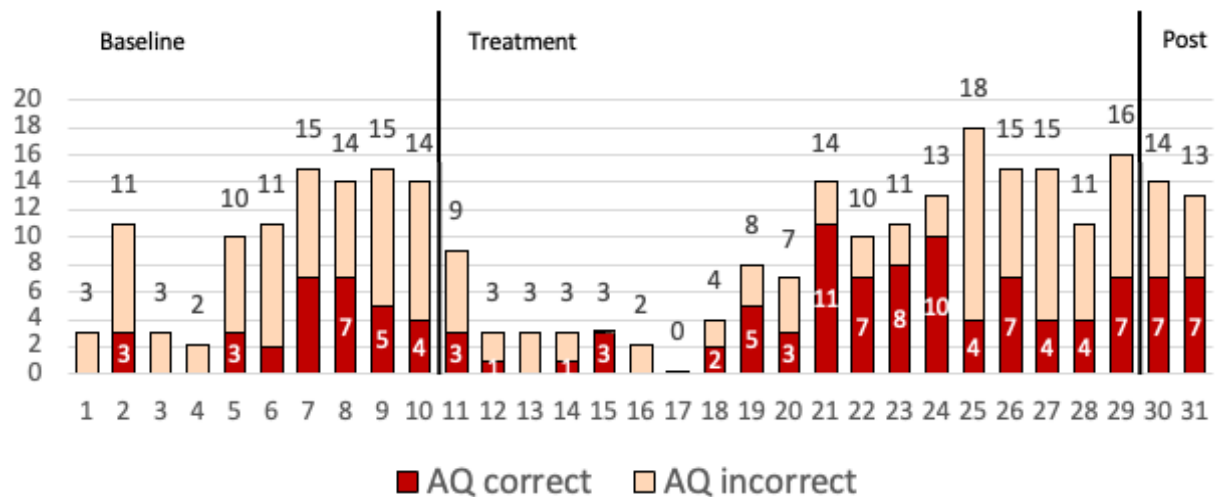

### DLD P1 Auxiliary Declarative Production

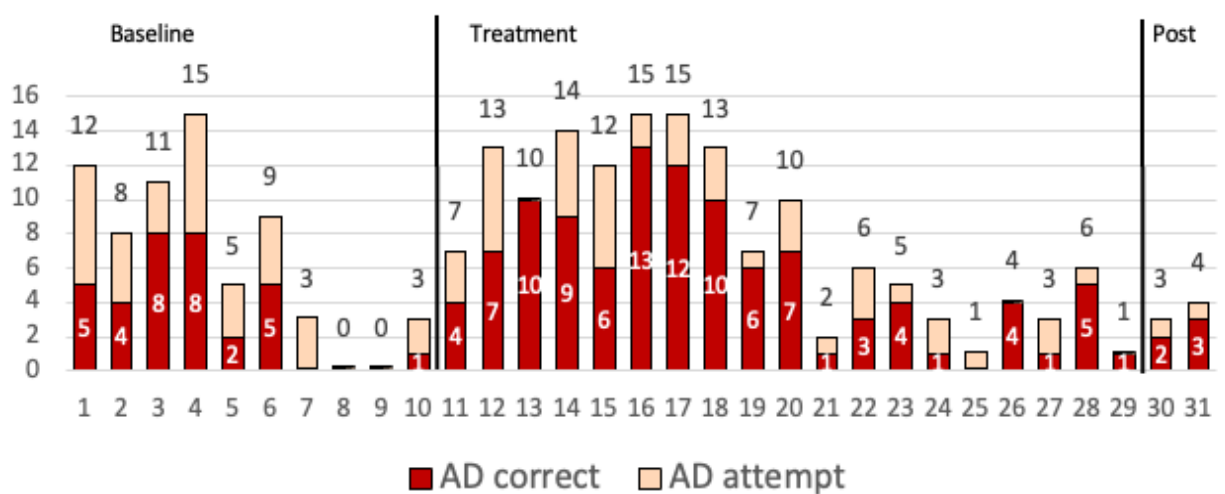

## DLD P1 Copula Question Production

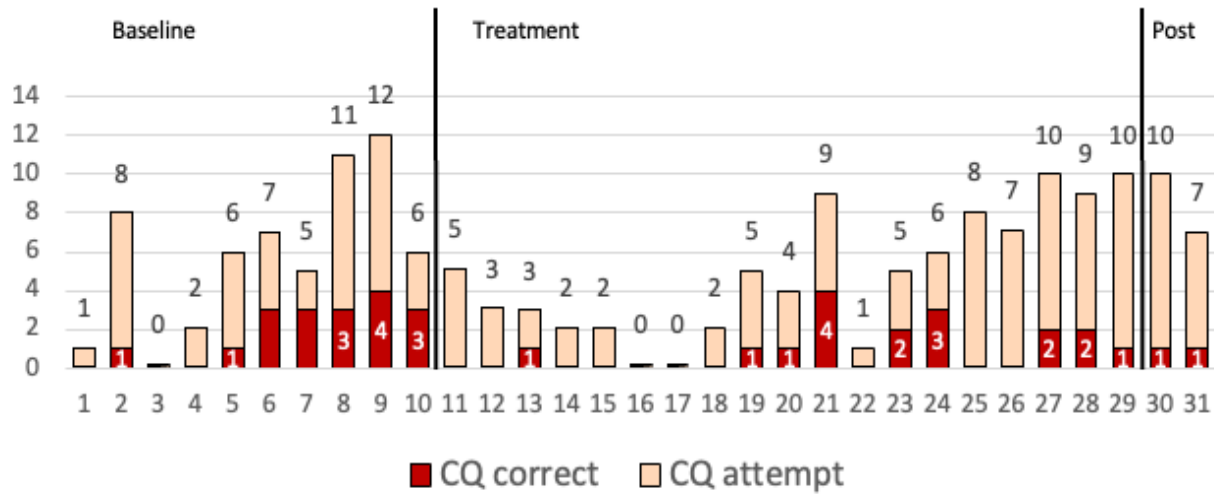

## DLD P1 Copula Declarative Production

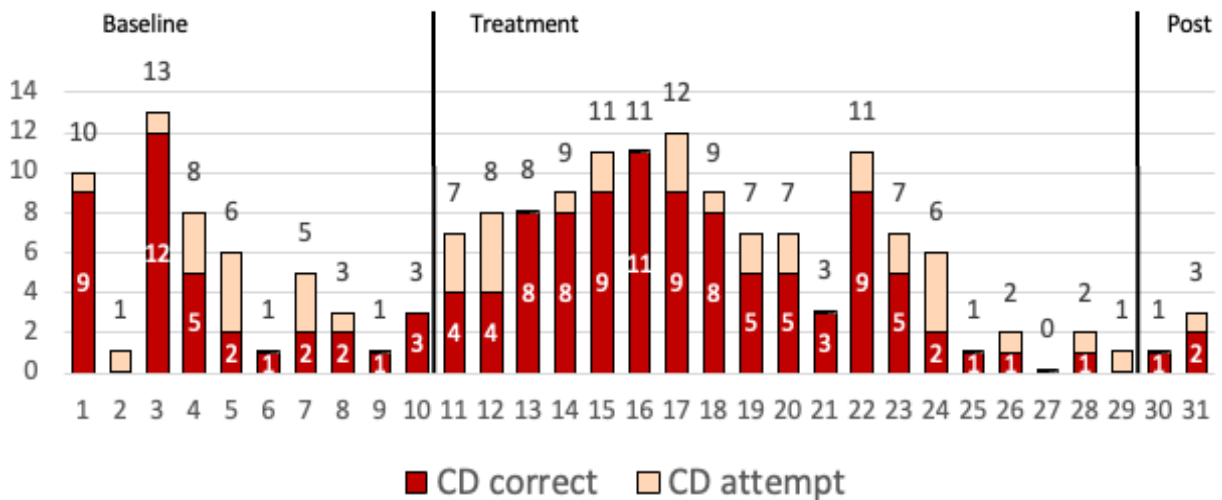

**DLD P2:**

**DLD P2 Auxiliary Question Production**

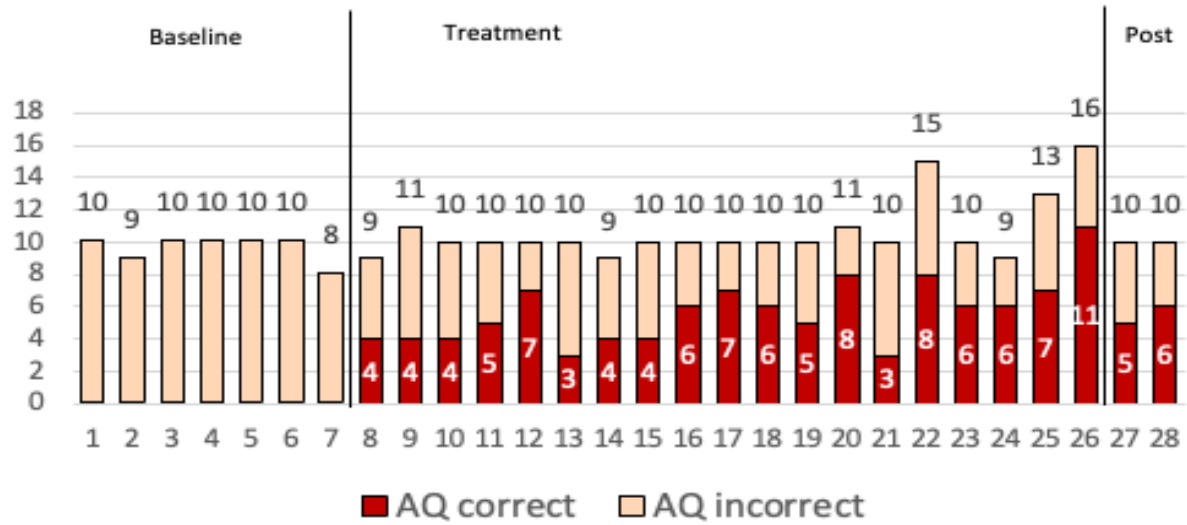

**DLD P2 Auxiliary Declarative Production**

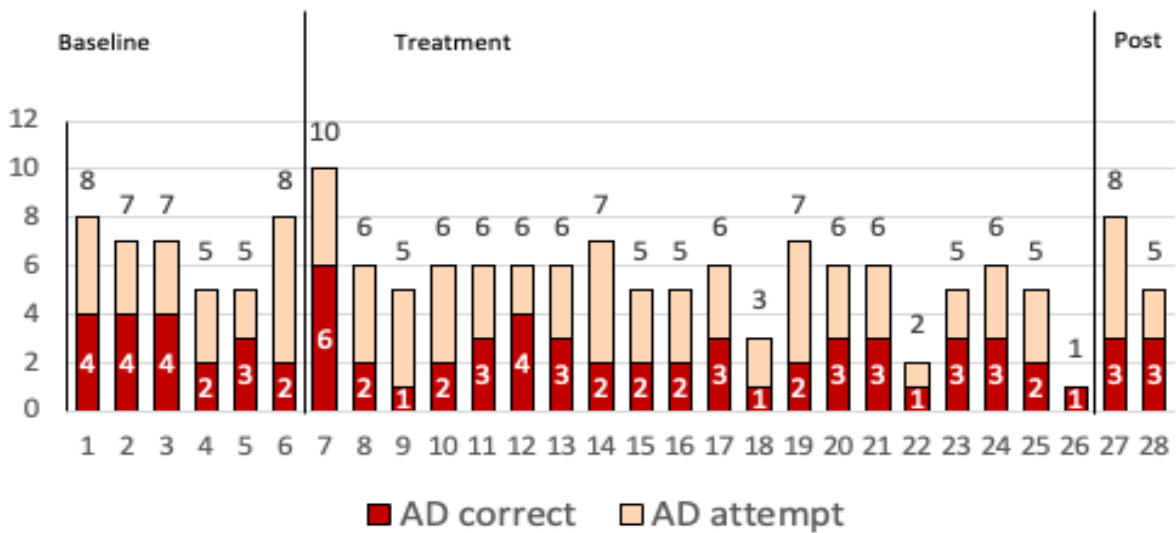

## DLD P2 Copula Question Production

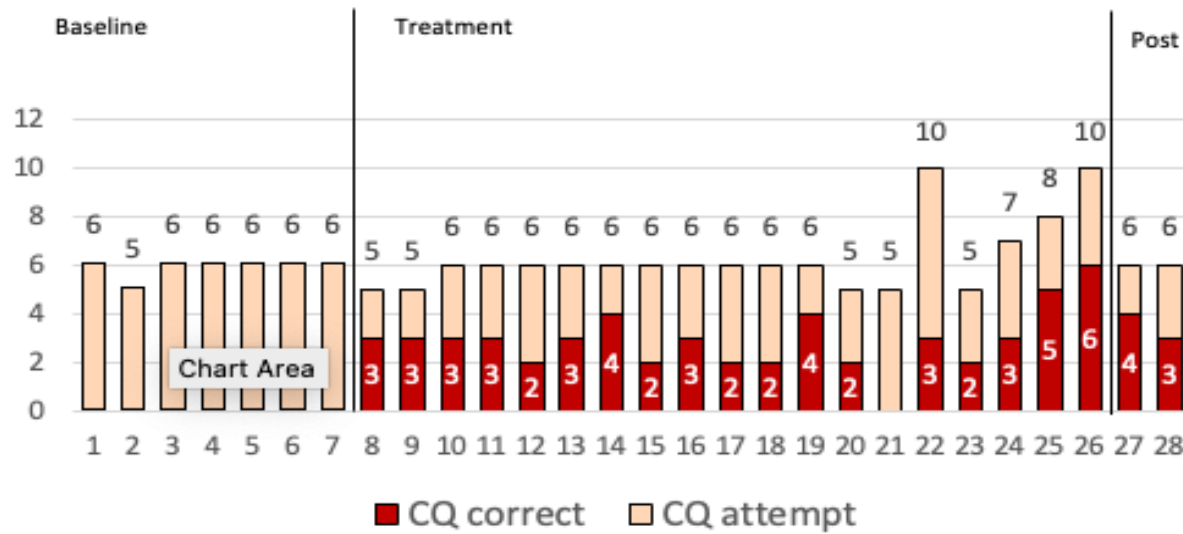

## DLD P2 Copula Declarative Production

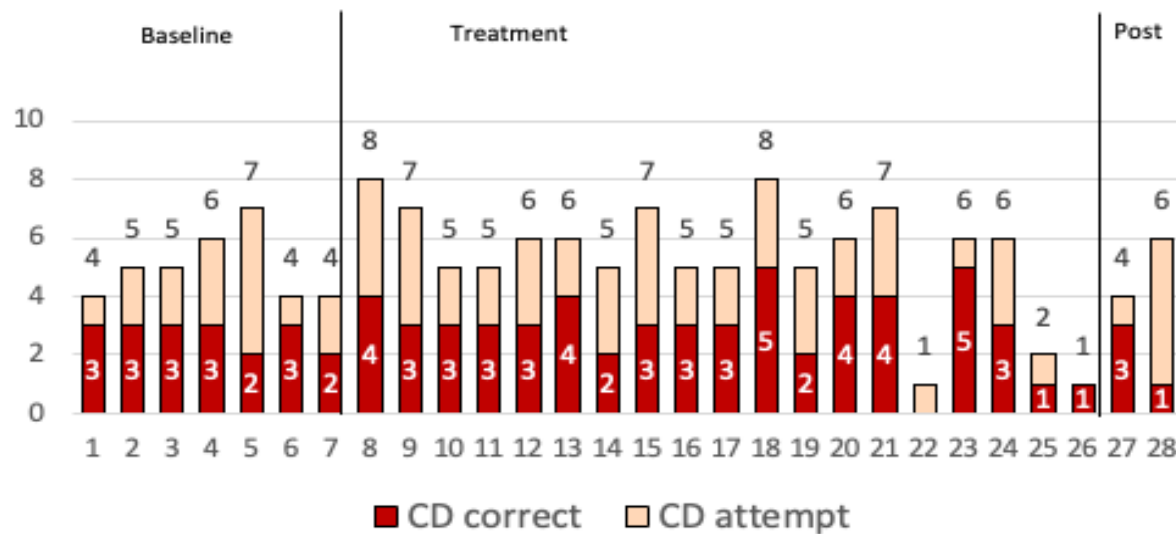

### DLD P3:

## DLD P3 Auxiliary Question Production

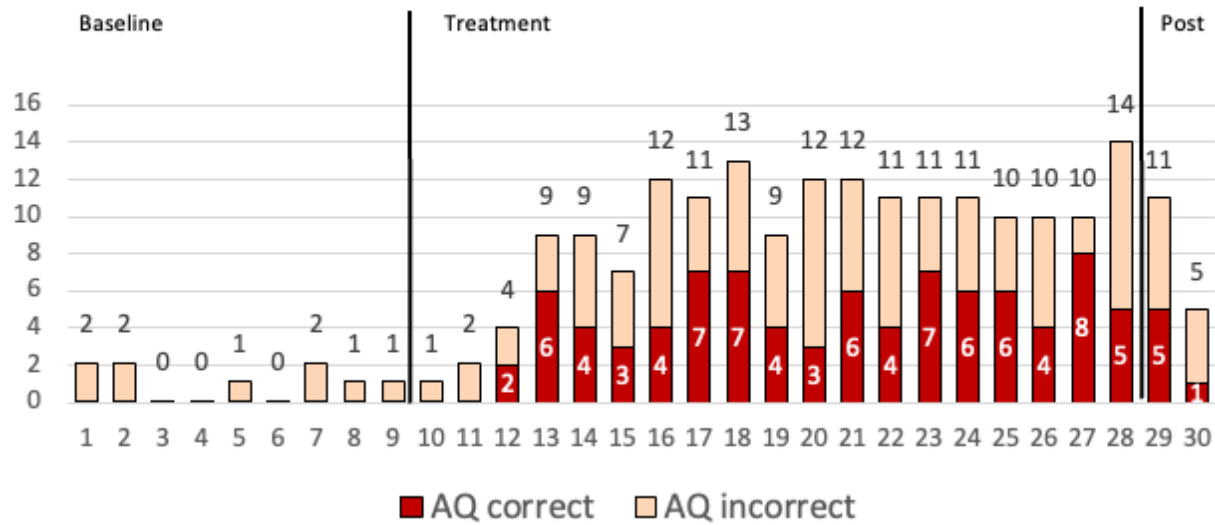

## DLD P3 Auxiliary Declarative Production

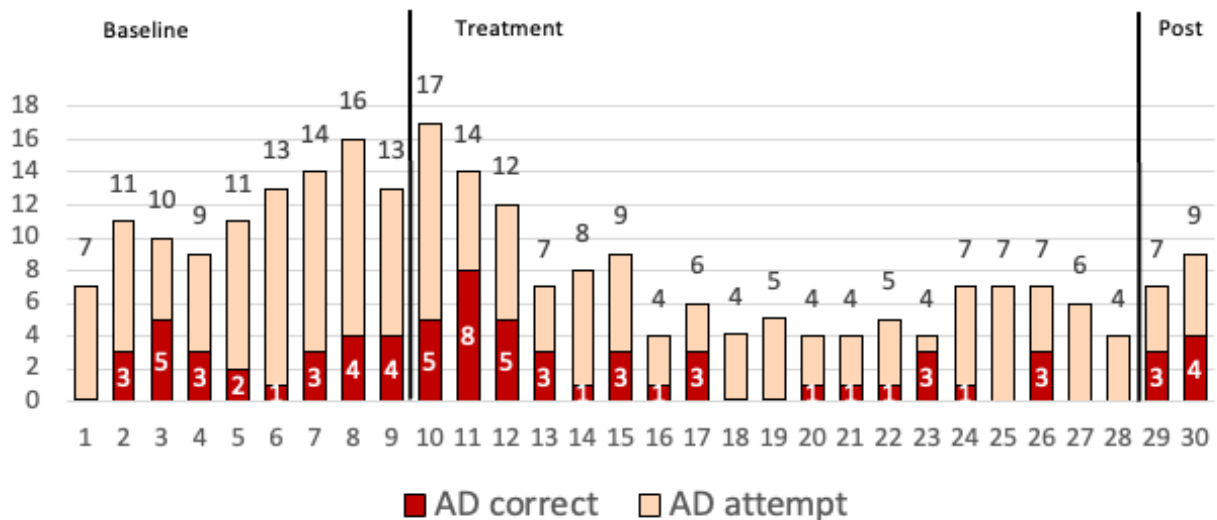

## DLD P3 Copula Question Production

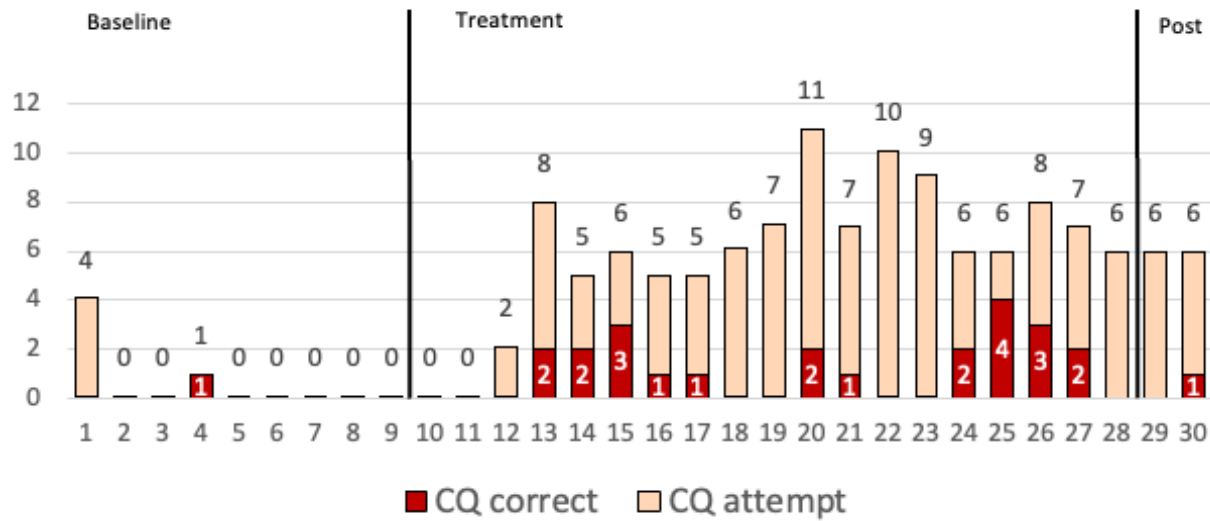

## DLD P3 Copula Declarative Production

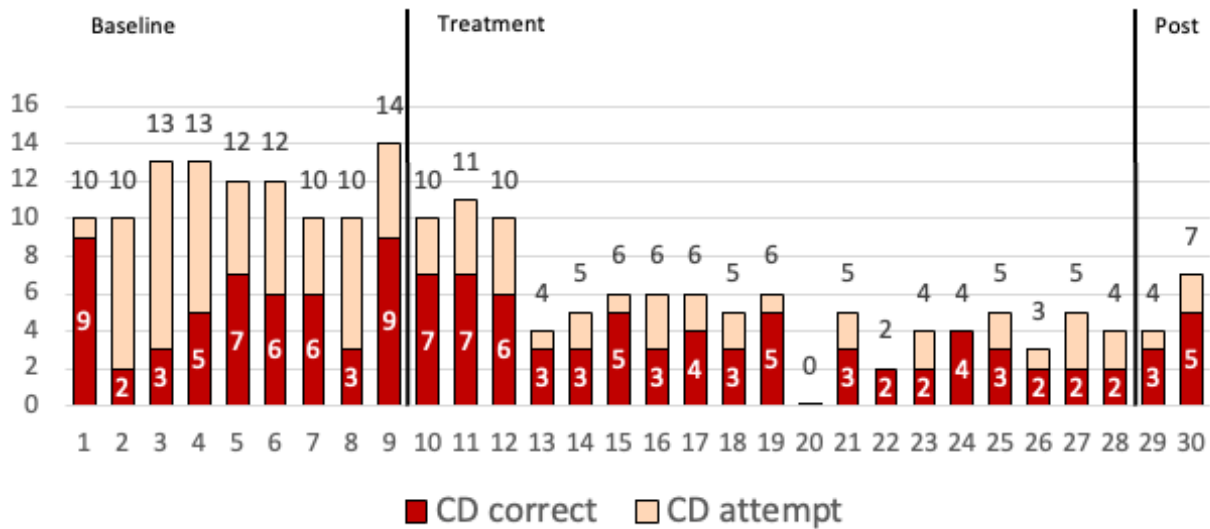

**DS P1:**

**DS P1 Auxiliary Question Production**

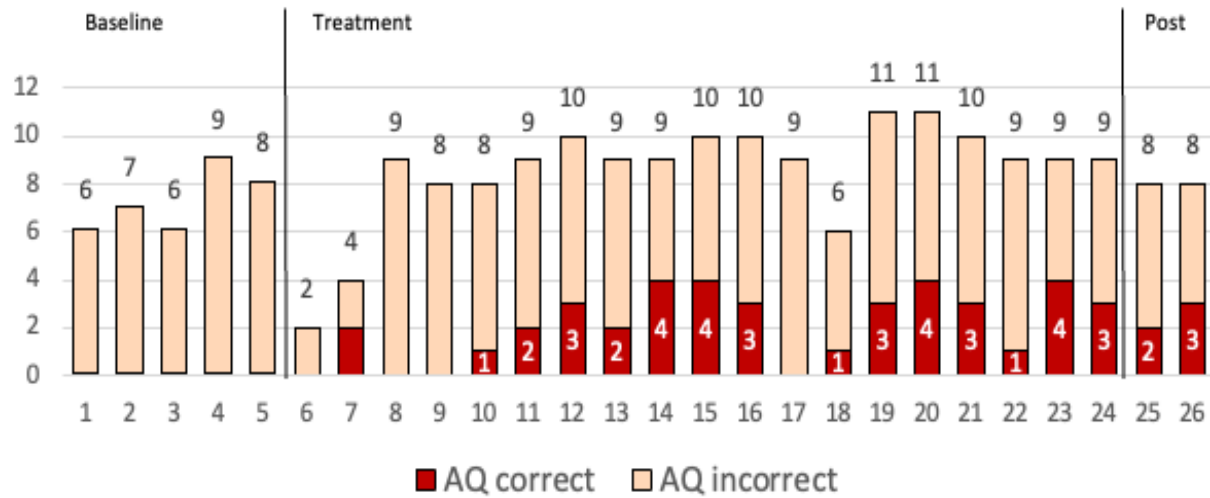

**DS P1 Auxiliary Declarative Production**

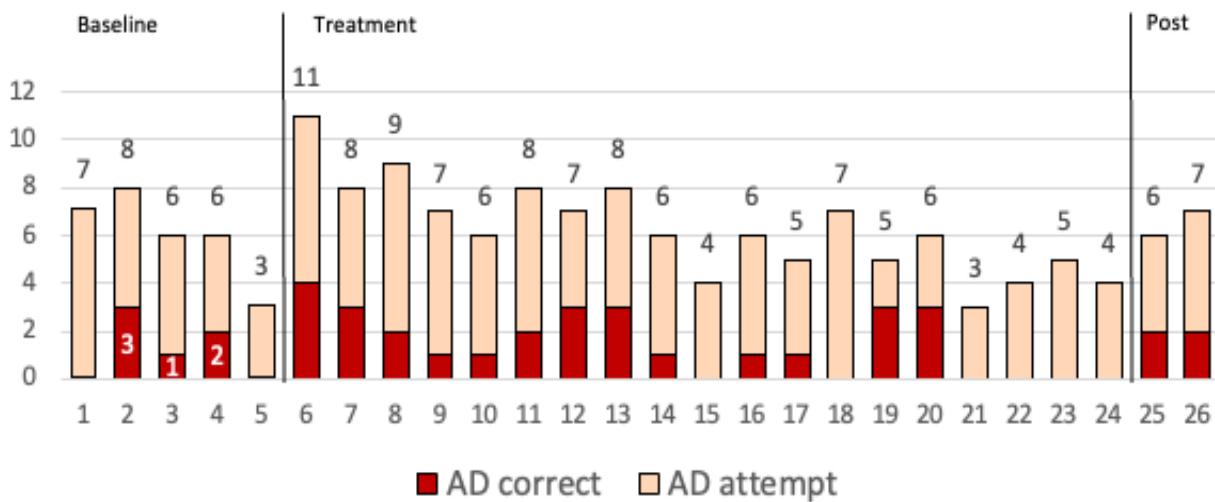

## DS P1 Copula Question Production

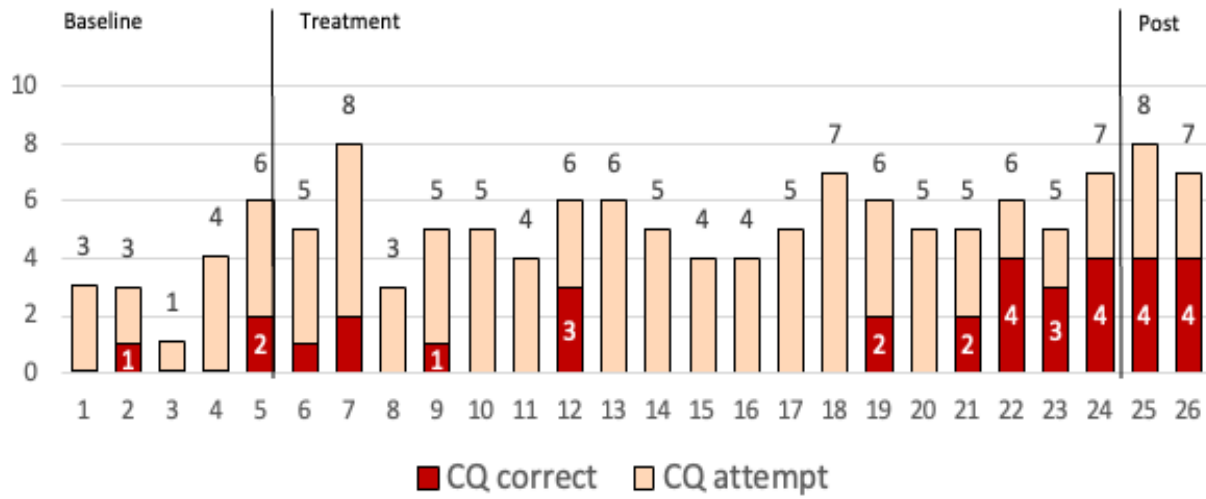

## DS P1 Copula Declarative Production

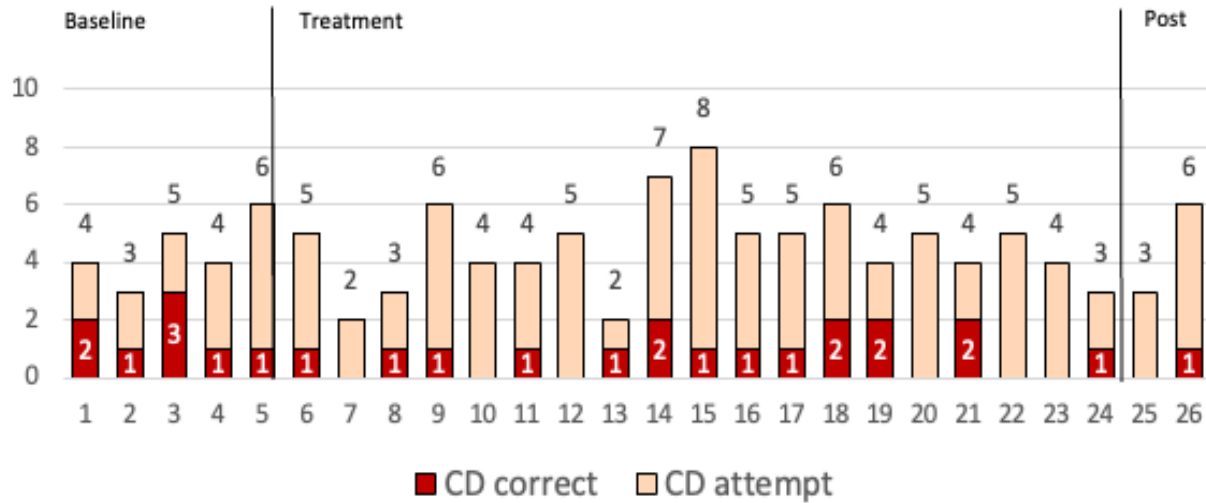

**DS P2:**

### DS P2 Auxiliary Question Production

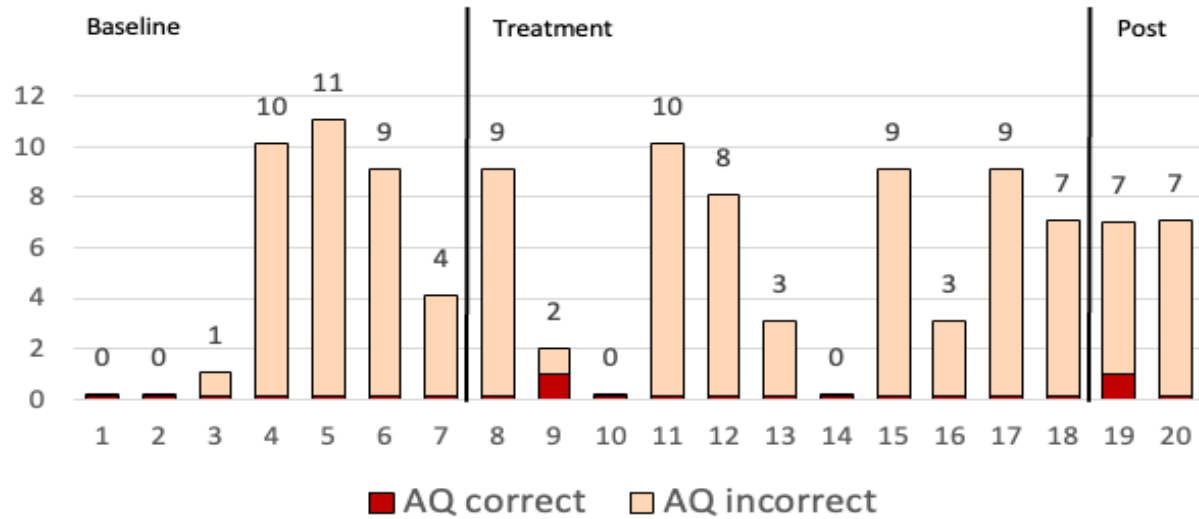

### DS P2 Auxiliary Declarative Production

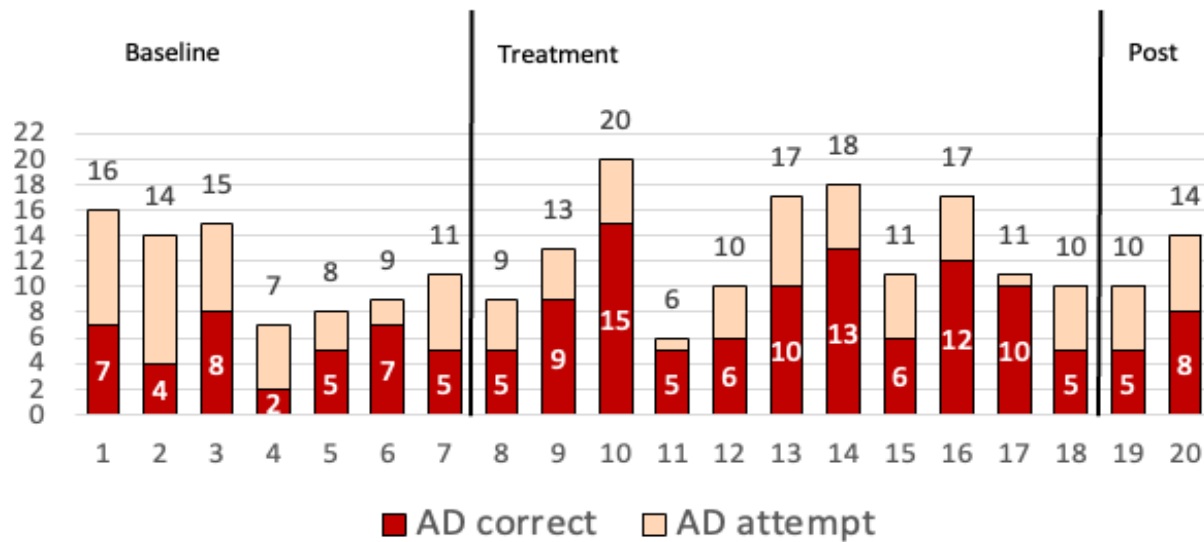

## DS P2 Copula Question Production

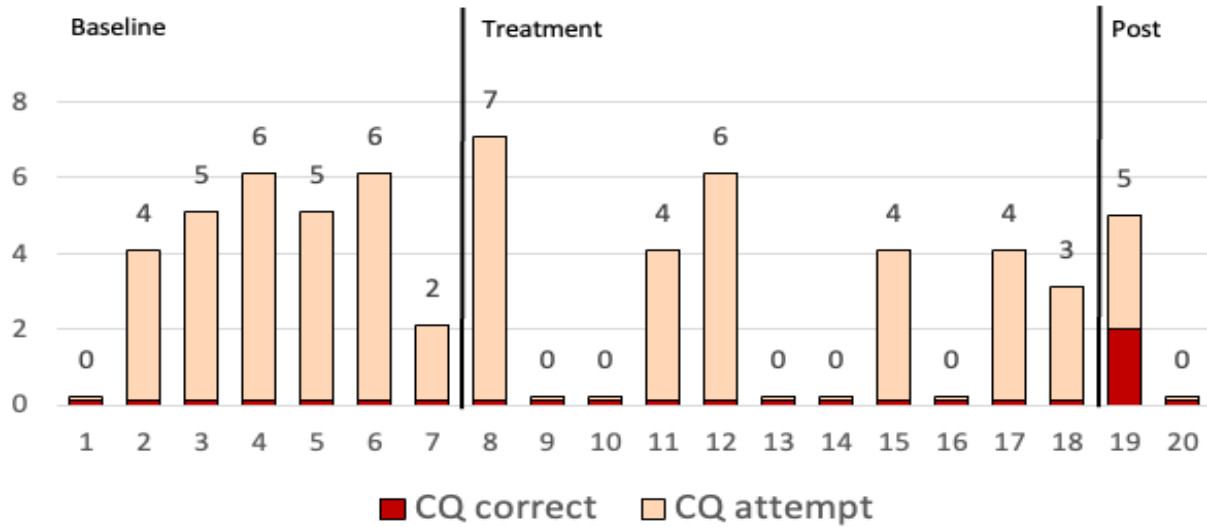

## DS P2 Copula Declarative Production

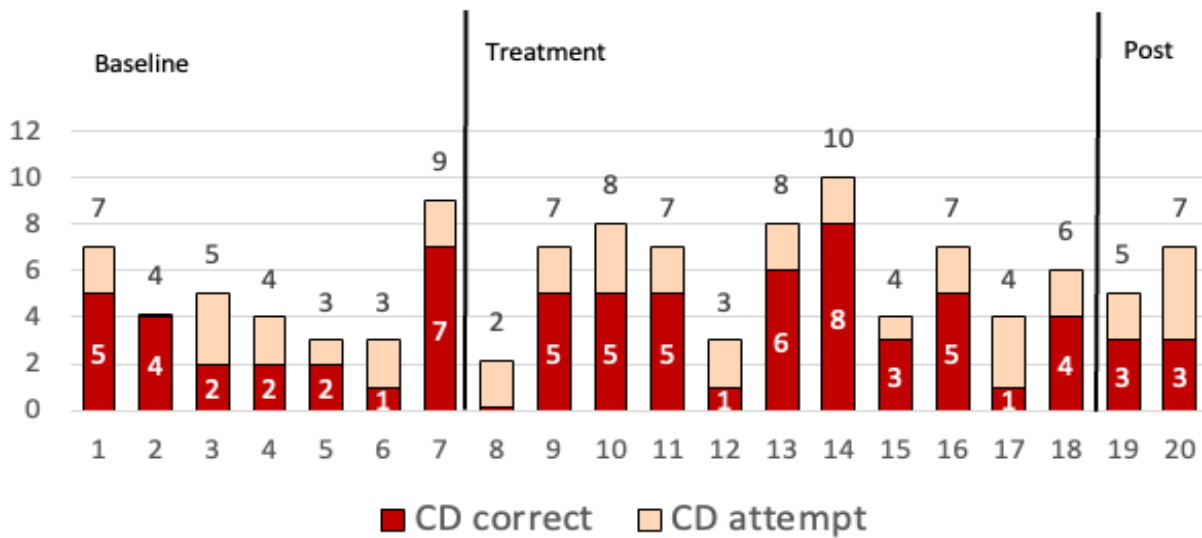

**DS P3:**

**DS P3 Auxiliary Question Production**

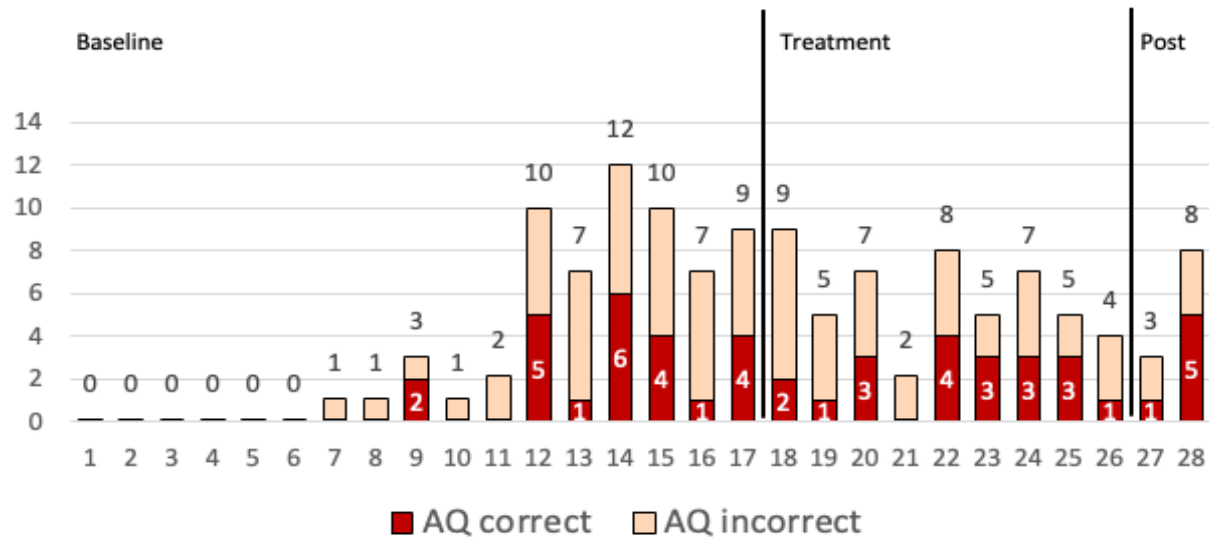

**DS P3 Auxiliary Declarative Production**

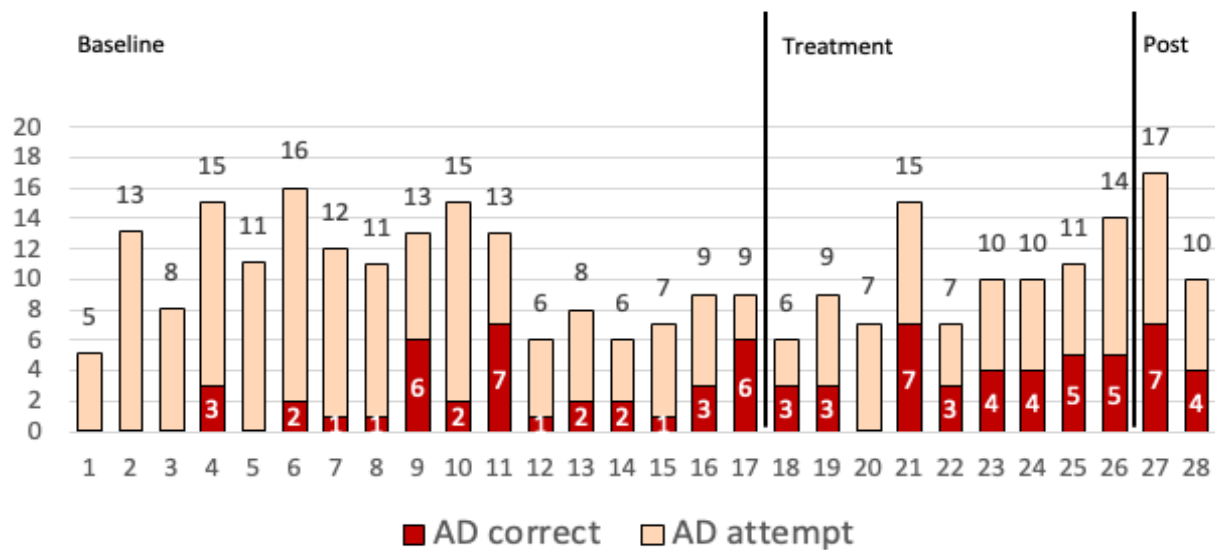

## DS P3 Copula Question Production

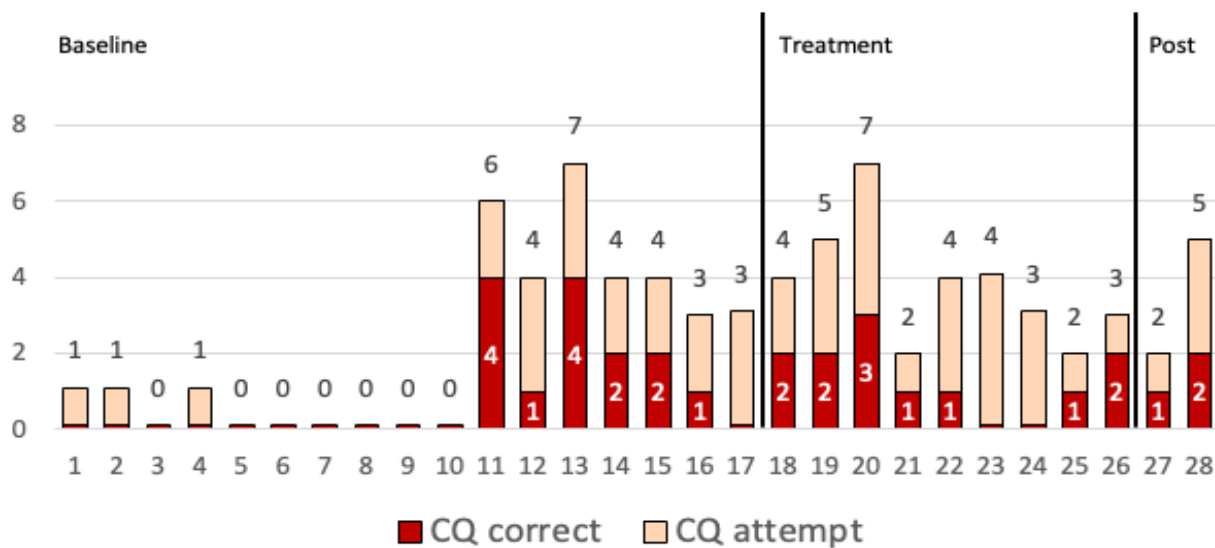

## DS P3 Copula Declarative Production

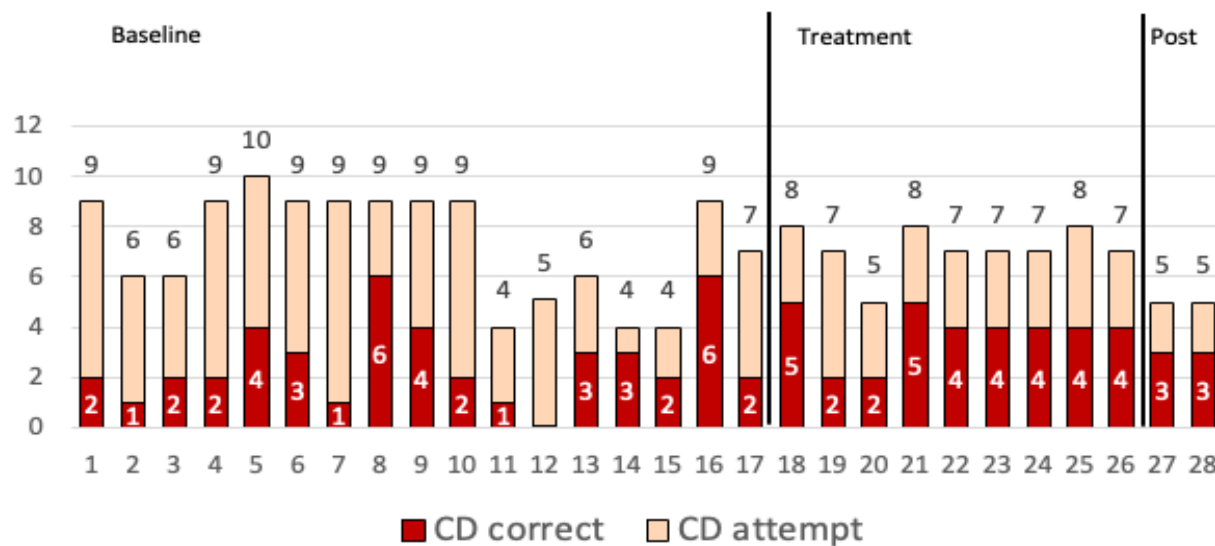

Supplement: Supplementary file 3 [file 1]
