# Supplementary material
Source: publisher figshare collection journal article supplement (https://asha.figshare.com/articles/dataset/_/27018124)
Supplement: Supplementary file 1 [file 1]

## Supplemental Material S1. Sample experimental probe for auxiliary BE questions.

### INTRO:

*Here is my friendly puppet. We are going to look at some pictures with him. He is a special puppet. We can understand the puppet. So, we can talk to him and ask him questions about the pictures. Let me show you.*

### Training:

**E:** *Look at this picture. I wonder if the cow can moo. Ask the puppet.*

**Target:** *"(Puppet) can the cow moo?"*

If the participant does not provide a question, provide the target and ask them to imitate it. Then re-administer the prompt.

**E:** *Great. Let's look at some more pictures.*

**Prompts:** *"Yes. Can you say it a different way?"*

Prompts are only provided if there is: (a) no response or, (b) no attempt to use a BE verb (e.g., *"She likes the cookie"*). No other feedback or cueing is allowed during this portion of the probe.

| Prompt                                                         | Target                             | Response             | Correct? |
|----------------------------------------------------------------|------------------------------------|----------------------|----------|
| I wonder if the boys are smiling. Ask the puppet.              | Are the boys smiling?              |                      |          |
| I wonder if the girls are washing their hands. Ask the puppet. | Are the girls washing their hands? |                      |          |
| I wonder if the boys are talking. Ask the puppet.              | Are the boys talking?              |                      |          |
| I wonder if the boys are pushing the swing. Ask the puppet.    | Are the boys pushing the swing?    |                      |          |
| I wonder if the girl is thinking. Ask the puppet.              | Is the girl thinking?              |                      |          |
| I wonder if the rabbit wiping the window. Ask the puppet.      | Is the rabbit wiping the window?   |                      |          |
| I wonder if the dog is looking at the plane. Ask the puppet.   | Is the dog looking at the plane?   |                      |          |
| I wonder if the boy is sweeping the floor. Ask the puppet.     | Is the boy sweeping the floor?     |                      |          |
| I wonder if the boys are reading. Ask the puppet.              | Are the boys reading?              |                      |          |
| I wonder if the girl is playing. Ask the puppet.               | Is the girl playing?               |                      |          |
|                                                                |                                    | <b>Total Correct</b> |          |
