# Supplementary material
Source: publisher figshare collection journal article supplement (https://asha.figshare.com/articles/dataset/_/27018124)
Supplement: Supplementary file 4 [file 1]

## Supplemental Material S2. Sample experimental probe for untreated structures.

### INTRO:

*We are going to look at some more pictures.*

**Prompts:** "Yes. Can you say it a different way?"

Prompts are only provided if there is: (a) no response or, (b) no attempt to use a BE verb (e.g., "She likes the cookie"). No other feedback or cueing is allowed during this portion of the probe.

| Prompt                     |                                                  | Target               | Response             | Correct? |
|----------------------------|--------------------------------------------------|----------------------|----------------------|----------|
| <b>Copula BE questions</b> |                                                  |                      |                      |          |
| P26                        | I wonder if the rocks are hard. Ask the puppet.  | Are the rocks hard?  |                      |          |
| S12                        | I wonder if the toy is broken. Ask the puppet.   | Is the toy broken?   |                      |          |
| S09                        | I wonder if the dog is cold. Ask the puppet.     | Is the dog cold?     |                      |          |
| P11                        | I wonder if the boys are hungry. Ask the puppet. | Are the boys hungry? |                      |          |
| P02                        | I wonder if the girls are wet. Ask the puppet.   | Are the girls wet?   |                      |          |
| S16                        | I wonder if the ball is orange. Ask the puppet.  | Is the ball orange?  |                      |          |
|                            |                                                  |                      | <b>Total Correct</b> |          |

| Prompt                        |                                            | Target                       | Response             | Correct? |
|-------------------------------|--------------------------------------------|------------------------------|----------------------|----------|
| <b>Copula Be sentences</b>    |                                            |                              |                      |          |
| P27                           | Tell me about the stars.                   | The stars are yellow.        |                      |          |
| S18                           | Tell me about the girl.                    | The girl is happy.           |                      |          |
| P02                           | Tell me about the girls.                   | The girls are sticky.        |                      |          |
| P24                           | Tell me about the dogs.                    | The dogs are asleep.         |                      |          |
| S30                           | Tell me about the shoe.                    | The shoe is clean.           |                      |          |
| S12                           | Tell me about the dog.                     | The dog is thirsty.          |                      |          |
|                               |                                            |                              | <b>Total Correct</b> |          |
| <b>Auxiliary BE sentences</b> |                                            |                              |                      |          |
| P08                           | Tell me what's happening with the cats.    | The cats are tying bows.     |                      |          |
| S05                           | Tell me what's happening with the cat.     | The cat is brushing her fur. |                      |          |
| S23                           | Tell me what's happening with the rabbit.  | The rabbit is watching tv.   |                      |          |
| P23                           | Tell me what's happening with the rabbits. | The rabbits are clapping.    |                      |          |

|     |                                            |                                  |                      |  |
|-----|--------------------------------------------|----------------------------------|----------------------|--|
| S13 | Tell me what's happening with the rabbit.  | The rabbit is biting the cheese. |                      |  |
| P09 | Tell me what's happening with the rabbits. | The rabbits are skating.         |                      |  |
|     |                                            |                                  | <b>Total Correct</b> |  |
