# Supplementary material
Source: publisher figshare collection journal article supplement (https://asha.figshare.com/articles/dataset/_/27018124)

**Supplemental Material S4.** Flowchart for determining continuation or completion of treatment.

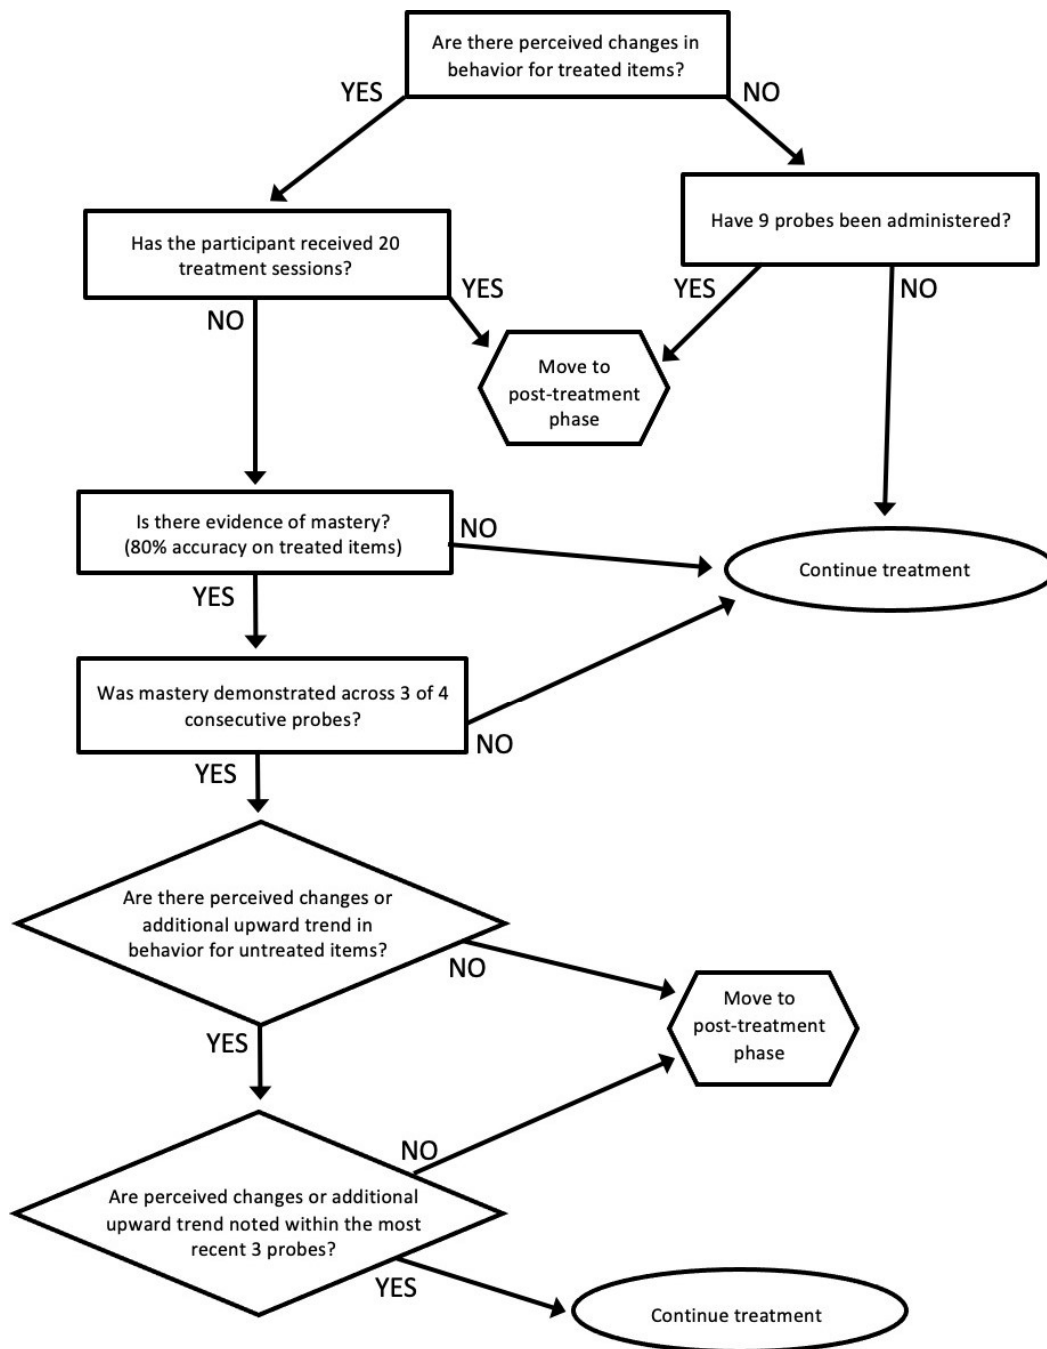

Supplement: Supplementary file 2 [file 1]
